# Supplementary material for: Fluorescent graphene quantum dots-enhanced machine learning for the accurate detection and quantification of Hg2+ and Fe3+ in real water samples
Source: Royal Society of Chemistry journal article supplement (doi:10.1039/d3en00702b), 2024-01-01
Supplement: d3en00702b1.pdf [file d3en00702b1.pdf]

*Electronic Supplementary Information for:*

**Fluorescent graphene quantum dots-enhanced machine learning for accurate detection and quantification of Hg<sup>2+</sup> and Fe<sup>3+</sup> in real water samples.**

Mauricio Llaver,<sup>a,\*</sup> Santiago D. Barrionuevo,<sup>b</sup> Jorge M. Núñez,<sup>c,d,e,f,g</sup> Agostina L. Chapana,<sup>a</sup> Rodolfo G. Wuilloud,<sup>a</sup> Myriam H. Aguirre<sup>f,g,h</sup> and Francisco J. Ibañez<sup>b,\*</sup>

<sup>a</sup> *Laboratorio de Química Analítica para Investigación y Desarrollo (QUIANID), Facultad de Ciencias Exactas y Naturales, Universidad Nacional de Cuyo / Instituto Interdisciplinario de Ciencias Básicas (ICB), CONICET UNCUYO, Padre J. Contreras 1300, (5500) Mendoza, Argentina.*

<sup>b</sup> *Instituto de Investigaciones Fisicoquímicas, Teóricas y Aplicadas (INIFTA). Universidad Nacional de La Plata - CONICET. Sucursal 4 Casilla de Correo 16 (1900) La Plata, Argentina.*

<sup>c</sup> *Resonancias Magnéticas-Centro Atómico Bariloche (CNEA, CONICET), S. C. Bariloche 8400, Río Negro, Argentina.*

<sup>d</sup> *Instituto de Nanociencia y Nanotecnología, CNEA, CONICET, S. C. Bariloche 8400, Río Negro, Argentina.*

<sup>e</sup> *Instituto Balseiro (UNCUYO, CNEA), Av. Bustillo 9500, S.C. de Bariloche 8400, Río Negro, Argentina.*

<sup>f</sup> *Instituto de Nanociencia y Materiales de Aragón, CSIC-Universidad de Zaragoza, C/ Pedro Cerbuna 12, 50009, Zaragoza, Spain.*

<sup>g</sup> *Laboratorio de Microscopías Avanzadas, Universidad de Zaragoza, Mariano Esquillor s/n, 50018, Zaragoza, Spain.*

<sup>h</sup> *Dpto. de Física de la Materia Condensada, Universidad de Zaragoza, C/ Pedro Cerbuna 12, 50009, Zaragoza, Spain.*

e-mail: [mllaver@mendoza-conicet.gob.ar](mailto:mllaver@mendoza-conicet.gob.ar)

e-mail: [fjiban@inifta.unlp.edu.ar](mailto:fjiban@inifta.unlp.edu.ar)

**S1.** The output files from the experimental obtention of the excitation-emission matrices (EEMs) with known  $\text{Hg}^{2+}$  and  $\text{Fe}^{3+}$  concentrations had to be pre-processed prior to the application of the machine learning models used for the prediction of analyte concentrations in real samples.

2D Excitation-emission matrix (EEM) for a single known  $\text{Hg(II)/Fe(III)}$  combination

| EX Wavelength/EM Wavelength | EX Wavelength |          |          |          |          |          |          |          |
|-----------------------------|---------------|----------|----------|----------|----------|----------|----------|----------|
|                             | 399.0         | 401.0    | 403.0    | 405.0    | 407.0    | 409.0    | 411.0    | 413.0    |
| 310.0                       | 3180.047      | 3333.720 | 3427.932 | 3513.985 | 3606.591 | 3667.432 | 3718.818 | 3800.214 |
| 312.0                       | 3334.405      | 3480.124 | 3575.497 | 3674.070 | 3743.884 | 3818.191 | 3871.404 | 3933.121 |
| 314.0                       | 3420.148      | 3564.604 | 3667.336 | 3758.919 | 3854.457 | 3920.152 | 3968.366 | 4040.615 |
| 316.0                       | 3502.088      | 3650.953 | 3752.527 | 3844.432 | 3942.588 | 4000.723 | 4068.455 | 4138.775 |
| 318.0                       | 3512.694      | 3664.145 | 3754.523 | 3852.983 | 3960.203 | 4025.770 | 4088.664 | 4170.255 |

1D Flattened EEM

| 399.0_310.0 | 401.0_310.0 | 403.0_310.0 | 405.0_310.0 | 407.0_310.0 | 409.0_310.0 | 411.0_310.0 |
|-------------|-------------|-------------|-------------|-------------|-------------|-------------|
| 3180.047    | 3333.72     | 3427.932    | 3513.985    | 3606.591    | 3667.432    | 3718.818    |

Stacked 1D EEMs for different  $\text{Hg(II)/Fe(III)}$  combinations

| Hg_ppm | Fe_ppm | 399.0_310.0 | 401.0_310.0 | 403.0_310.0 | 405.0_310.0 | 407.0_310.0 | 409.0_310.0 | 411.0_310.0 |
|--------|--------|-------------|-------------|-------------|-------------|-------------|-------------|-------------|
| 0.0000 | 0.0000 | 3180.047    | 3333.720    | 3427.932    | 3513.985    | 3606.591    | 3667.432    | 3718.818    |
| 0.0026 | 0.0000 | 3203.475    | 3376.472    | 3493.045    | 3609.939    | 3730.667    | 3826.925    | 3906.227    |
| 0.0034 | 0.0000 | 3112.786    | 3269.496    | 3387.882    | 3498.708    | 3624.783    | 3701.099    | 3777.906    |
| 0.0400 | 0.0000 | 1675.251    | 1718.979    | 1749.344    | 1792.057    | 1833.279    | 1871.723    | 1903.284    |
| 0.0500 | 0.0000 | 1456.329    | 1481.507    | 1504.970    | 1534.334    | 1563.514    | 1599.899    | 1621.381    |
| 0.0018 | 0.0000 | 3337.422    | 3508.959    | 3629.941    | 3758.494    | 3884.181    | 3975.637    | 4072.255    |

Dimensionality reduction and machine learning model training

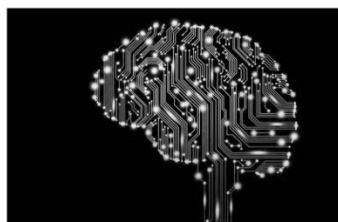

TRAINED MACHINE LEARNING MODEL

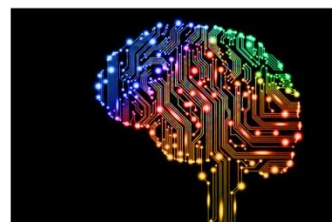

PREDICTIONS OF REAL SAMPLES

**Figure S1.** Schematic representation of the data handling process.

**S2. Additional XPS.** To complement the characterization of the urea-modified graphene quantum dots (uGQDs) and 1-nitroso-2-naphthol-modified NN-uGQDs, X-ray photoelectron spectra of pristine 1-nitroso-2-naphthol (NN).

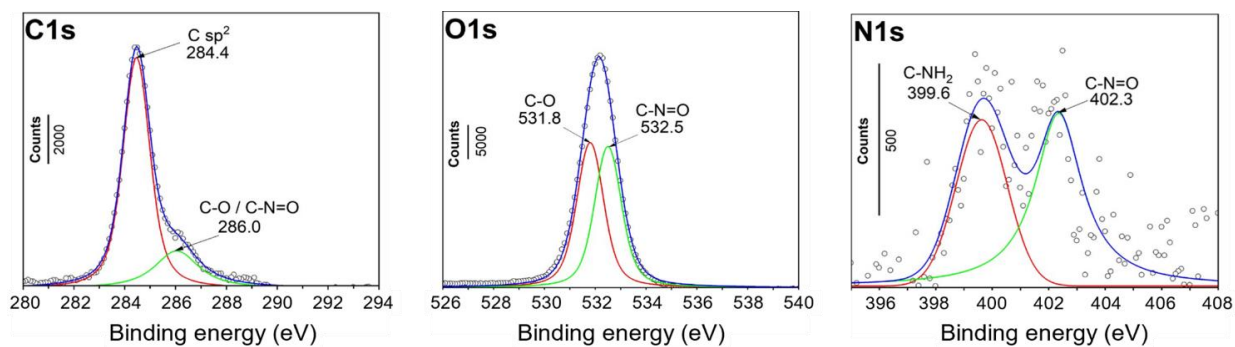

**Figure S2.** Top: C 1s, O 1s and N 1s XPS spectra for pristine NN, including the deconvolution of the instrumental signal.

**S3. Excitation Emission Matrix (EMM) for GQDs synthesized without urea.** The EMMs for graphene quantum dots (GQDs) synthesized without urea, as control, show similarities with that of urea-modified graphene quantum dots. The main difference between both cases is the EMM observed for uGQDs with an excitation wavelength of 315 nm, which is not present in the case of GQDs.

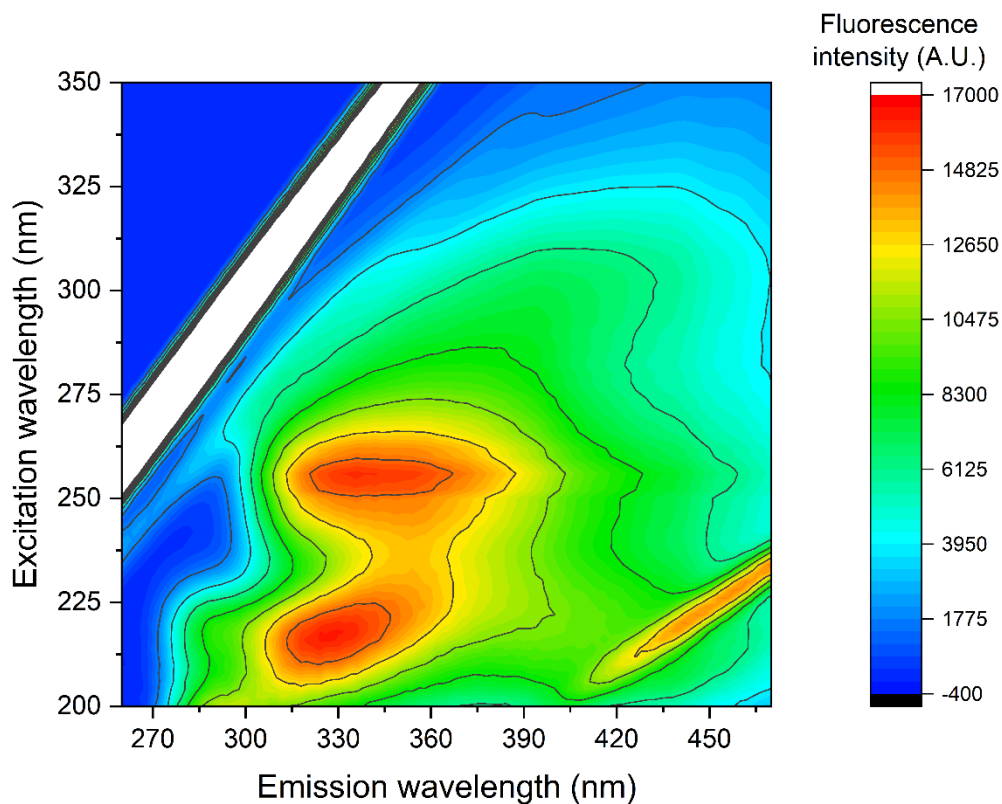

**Figure S3.** Excitation-emission matrix (EMM) for as-synthesized graphene quantum dots. The main high-intensity emission resulting from scattering (when  $\lambda_{exc} = \lambda_{em}$ ) has been whitened to improve visualization.

**S4.** The EMMs of 1-nitroso-2-naphthol-modified nitrogenated graphene quantum dots (NN-uGQDs), in the presence of  $0.20 \text{ mg L}^{-1}$  of both  $\text{Hg}^{2+}$  and  $\text{Fe}^{3+}$ , show significant differences in the emission profile. These differences were key for the application of the developed machine learning model, used for the simultaneous prediction of  $\text{Hg}^{2+}$  and  $\text{Fe}^{3+}$  concentrations in unknown samples.

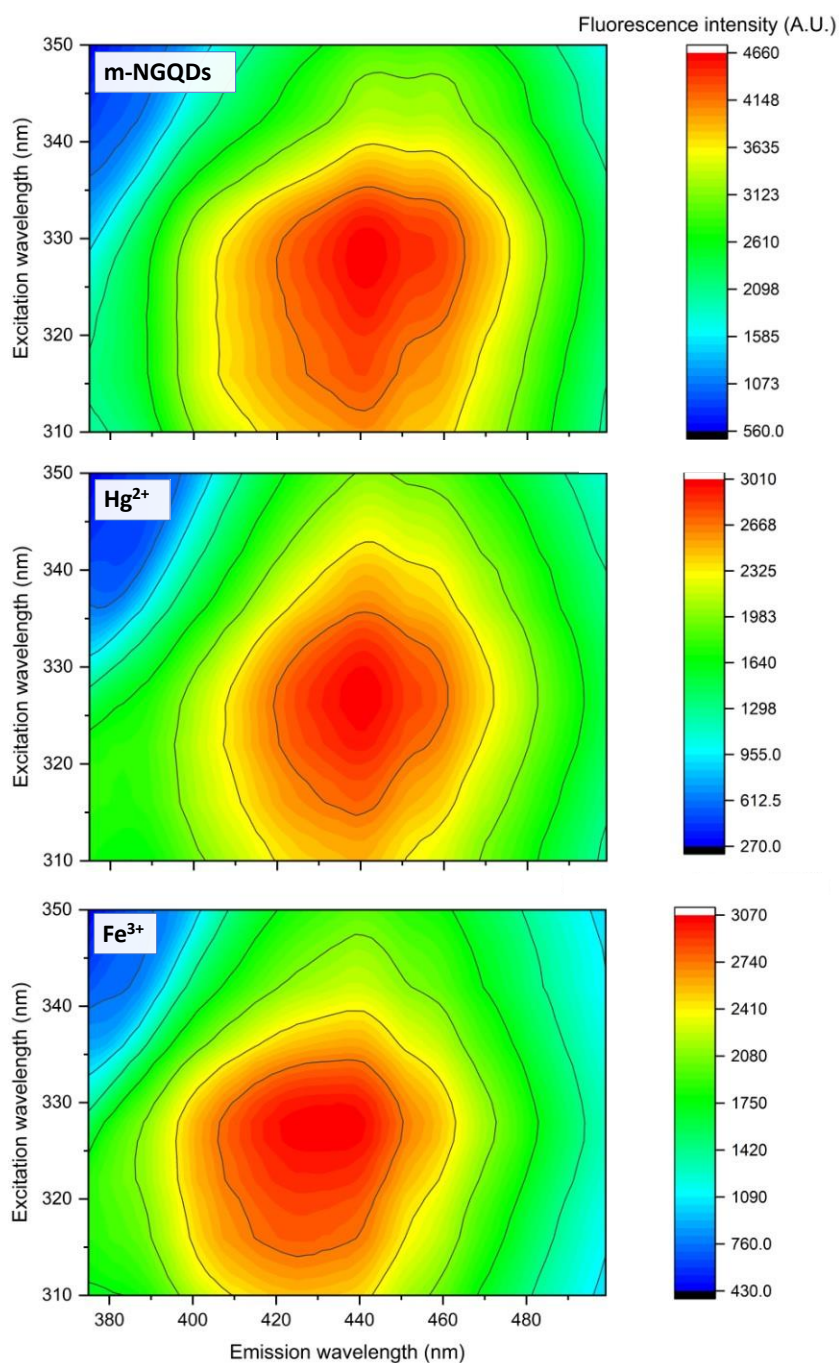

**Figure S4.** EMM spectra for 1-nitroso-2-naphthol-modified nitrogenated graphene quantum dots before (m-NGQDs, shown on top) and after the addition of  $0.20 \text{ mg L}^{-1}$  of  $\text{Hg}^{2+}$  (middle) and  $\text{Fe}^{3+}$  (bottom).

**S5. Response time.** The response time of the probe differed for the studied analytes, having  $\text{Hg}^{2+}$  and immediate effect on the emission, while  $\text{Fe}^{3+}$  took 15 min to produce its full quenching effect.

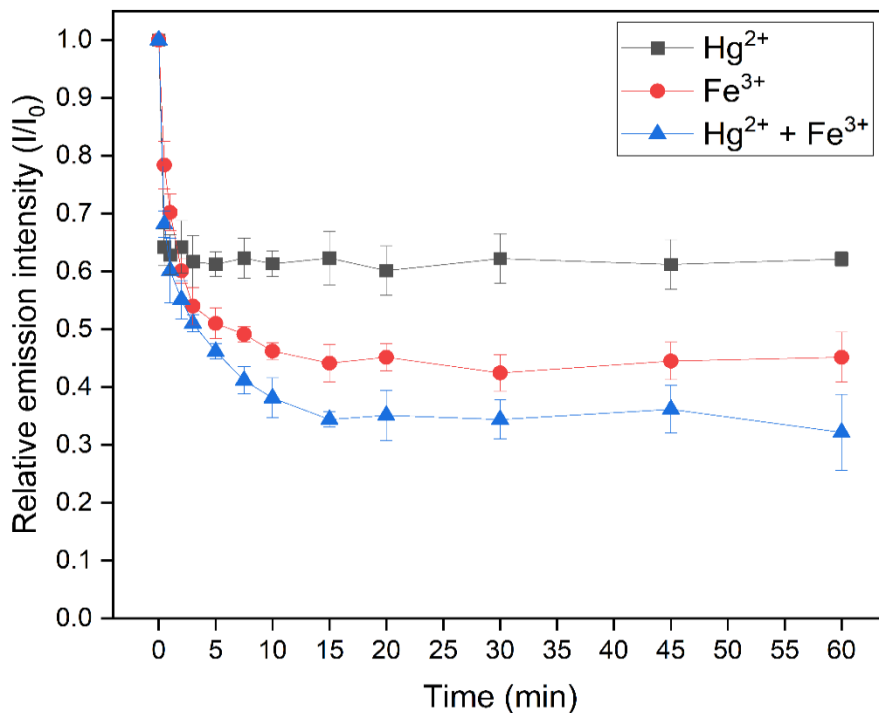

**Figure S5.** Relative EMM intensity of 1-nitroso-2-naphthol-functionalized N-doped graphene quantum dots as a function of time after the addition of  $0.35 \text{ mg mL}^{-1}$  of  $\text{Hg}^{2+}$ ,  $0.50 \text{ mg mL}^{-1}$   $\text{Fe}^{3+}$  and  $0.35 \text{ mg mL}^{-1}$  of  $\text{Hg}^{2+} + 0.50 \text{ mg mL}^{-1}$   $\text{Fe}^{3+}$ . The spectra taken at time = 0 has been considered as the reference emission intensity ( $I_0$ ) and  $n = 3$ .

## S6. Table comparing different Fluorescent Sensors

**Table S1.** Comparison of the hereby presented results with other recently published GQD-based fluorescence sensors for  $Hg^{2+}$  and  $Fe^{3+}$  determination.

| <i>Fluorescence Sensor</i> | <i>Synthesis method</i>                      | <i>Linear range</i>              | <i>LOD</i>             |                        | <i>Real Samples</i>                                | <i>Reference</i> |
|----------------------------|----------------------------------------------|----------------------------------|------------------------|------------------------|----------------------------------------------------|------------------|
|                            |                                              |                                  | <i>Hg<sup>2+</sup></i> | <i>Fe<sup>3+</sup></i> |                                                    |                  |
| Glutathione-doped GQDs     | Pyrolysis                                    | 1-150 $\mu$ M                    | -                      | 0.10 $\mu$ M           | Drinking water                                     | 1                |
| N-doped GQDs               | Hydrothermal                                 | 0-30 $\mu$ M                     | 0.25nM                 | -                      | River water                                        | 2                |
| P, N-doped GQDs            | Pyrolysis                                    | Not reported                     | 0.13 $\mu$ M           | -                      | Natural spring water, river water and serum sample | 3                |
| GQDs                       | Pyrolysis                                    | 0–60 nM                          | -                      | 0.024 nM               | Drinking water                                     | 4                |
| NN-u-GQDs                  | Electrochemical exfoliation from 3D graphene | 0-0.02 $\mu$ M<br>0-0.08 $\mu$ M | 0.005 $\mu$ M          | 0.017 $\mu$ M          | Tap water, river water and dam water               | This work        |

**S7.** Instrumental conditions for the determination of  $\text{Hg}^{2+}$  in water samples by cold vapor-atomic fluorescence spectrometry. All measurements were carried out on samples that were previously acidified with  $\text{HNO}_3$  up to a final concentration of  $1.0 \text{ mol L}^{-1}$ . The calibration curve was obtained using standard samples prepared in  $1.0 \text{ mol L}^{-1}$   $\text{HNO}_3$ . On the other hand, the spectrophotometric method used for  $\text{Fe}^{3+}$  determination was based on a liquid-liquid extraction using ethyl acetate, after addition of  $\text{KSCN}$  as complexing and chromogenic reagent.

**Table S2.** Instrumental conditions for the determination of  $\text{Hg}^{2+}$  in water samples by cold vapor-atomic fluorescence spectrometry.

| <i>AFS instrumental conditions</i>      |                                         |
|-----------------------------------------|-----------------------------------------|
| Wavelength                              | 257.3 nm                                |
| Measurement mode                        | Peak height                             |
| Primary lamp current                    | 8.0 mA                                  |
| Atomizer temperature                    | 300 °C                                  |
| Boost current                           | 0                                       |
| PMT voltage                             | 240 V                                   |
| <i>Cold vapor generation conditions</i> |                                         |
| Sample volume                           | 2.0 mL                                  |
| Carrier                                 | $1.0 \text{ mol L}^{-1}$ $\text{HNO}_3$ |
| Carrier flow rate                       | $4.0 \text{ mL min}^{-1}$               |
| Reductant                               | 0.5% (w/v) $\text{NaBH}_4$              |
| Reductant flow rate                     | $4.0 \text{ mL min}^{-1}$               |
| Carrier gas and flow rate               | Ar, $500 \text{ mL min}^{-1}$           |



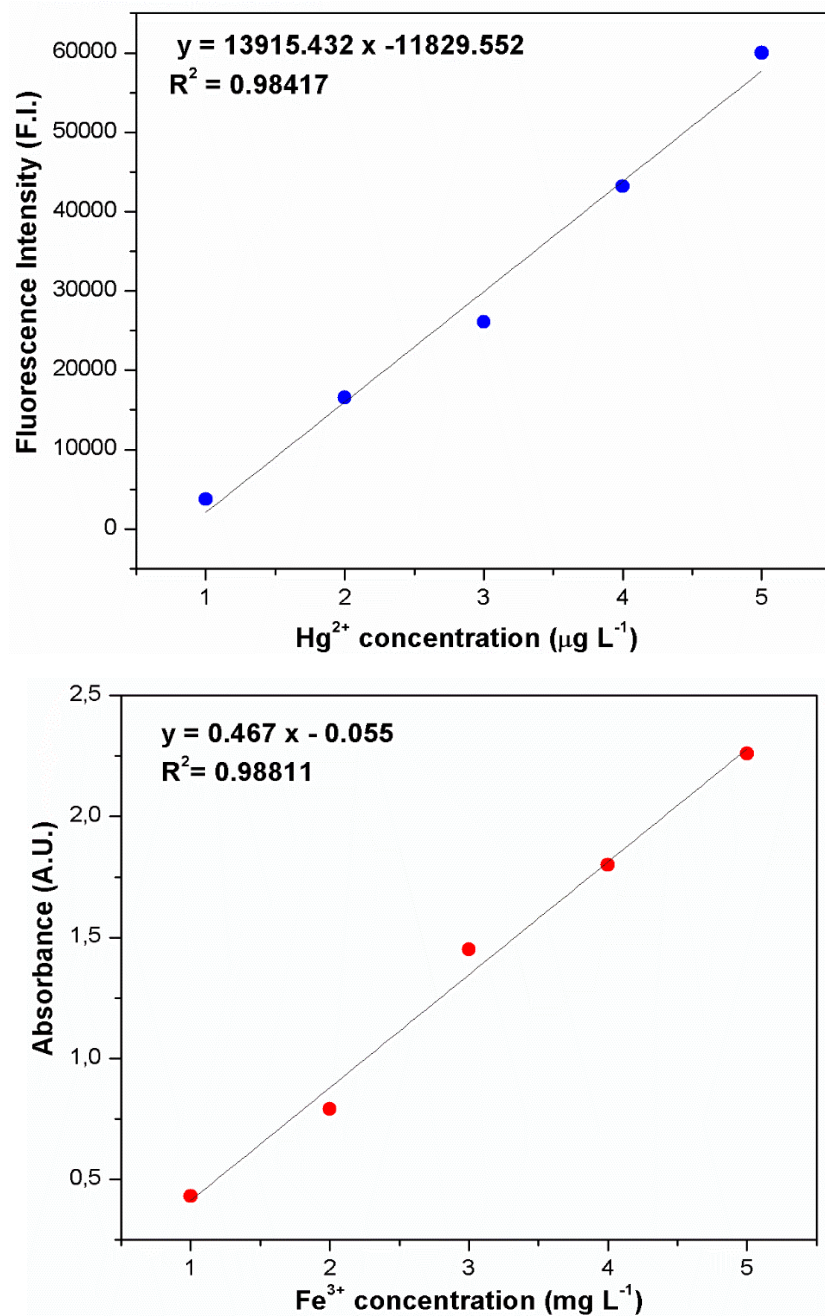

**Figure S6.** Calibration curves for Hg<sup>2+</sup> (above) and Fe<sup>3+</sup> (below) are presented, corresponding to the spectrophotometric and CV-AFS measurements utilized in the validation process.

## References

- (1) Saenwong, K.; Nuengmatcha, P.; Sricharoen, P.; Limchoowong, N.; Chanthai, S. GSH-Doped GQDs Using Citric Acid Rich-Lime Oil Extract for Highly Selective and Sensitive Determination and Discrimination of Fe<sup>3+</sup> and Fe<sup>2+</sup> in the Presence of H<sub>2</sub>O<sub>2</sub> by a Fluorescence “Turn-off” Sensor. *RSC Advances* **2018**, *8* (18), 10148–10157. <https://doi.org/10.1039/c7ra13432k>.
- (2) Xiong, Z.; Zou, Y.; Cao, X.; Lin, Z. Color-Tunable Fluorescent Nitrogen-Doped Graphene Quantum Dots Derived from Pineapple Leaf Fiber Biomass to Detect Hg<sup>2+</sup>. *Chinese Journal of Analytical Chemistry* **2022**, *50* (2), 69–76. <https://doi.org/10.1016/j.cjac.2021.10.003>.
- (3) Şenol, A. M.; Kassa, S. B.; Onganer, Y. A Simple Fluorescent “Turn off-on” Sensor Based on P, N-Doped Graphene Quantum Dots for Hg<sup>2+</sup> and Cysteine Determination. *Sensors and Actuators A: Physical* **2023**, *356*, 114362. <https://doi.org/10.1016/j.sna.2023.114362>.
- (4) Mandal, D.; De, P.; Khatun, S.; Gupta, A. N.; Chandra, A. Highly Fluorescent Graphene Quantum Dots as “Turn off–on” Nanosensor for Detecting Toxic Metal Ions to Organic Pollutant. *Int. J. Environ. Sci. Technol.* **2024**, *21* (2), 1637–1648. <https://doi.org/10.1007/s13762-023-05033-1>.
